# Supplementary material for: Synthesis and surface grafting of a β-cyclodextrin dimer facilitating cooperative inclusion of 2,6-ANS
Source: publisher site journal article supplement (doi:10.3762/bjoc.11.58), 2015-04-21
Supplement: Additional file 1 [file 1860-5397-11-58-S1.pdf]

# Supporting Information

for

## **Synthesis and surface grafting of a $\beta$ -cyclodextrin dimer facilitating cooperative inclusion of 2,6-ANS**

Lars W. Stade<sup>1</sup>, Thorbjørn T. Nielsen<sup>1</sup>, Laurent Duroux<sup>1</sup>, Reinhard Wimmer<sup>1</sup>, Kyoko Shimizu<sup>2</sup> and Kim L. Larsen<sup>\*1</sup>

Address: <sup>1</sup>Department of Biotechnology, Chemistry and Environmental Engineering, Aalborg University, Frederik Bajers Vej 7H, DK-9220 Aalborg East, Denmark and

<sup>2</sup>Department of Chemistry, Aarhus University, Langelandsgade 140, DK-8000 Aarhus, Denmark

Email: Kim Lambertsen Larsen - kll@bio.aau.dk

\*Corresponding author

**<sup>1</sup>H NMR and <sup>13</sup>C HSQC spectra of  $\beta$ -CD dimer,  
<sup>13</sup>C HSQC spectra of  $\beta$ -CD dimer in complex with 2,6-ANS and  
TIRF 2,6-ANS titration on bare quartz**

## NMR spectra

a

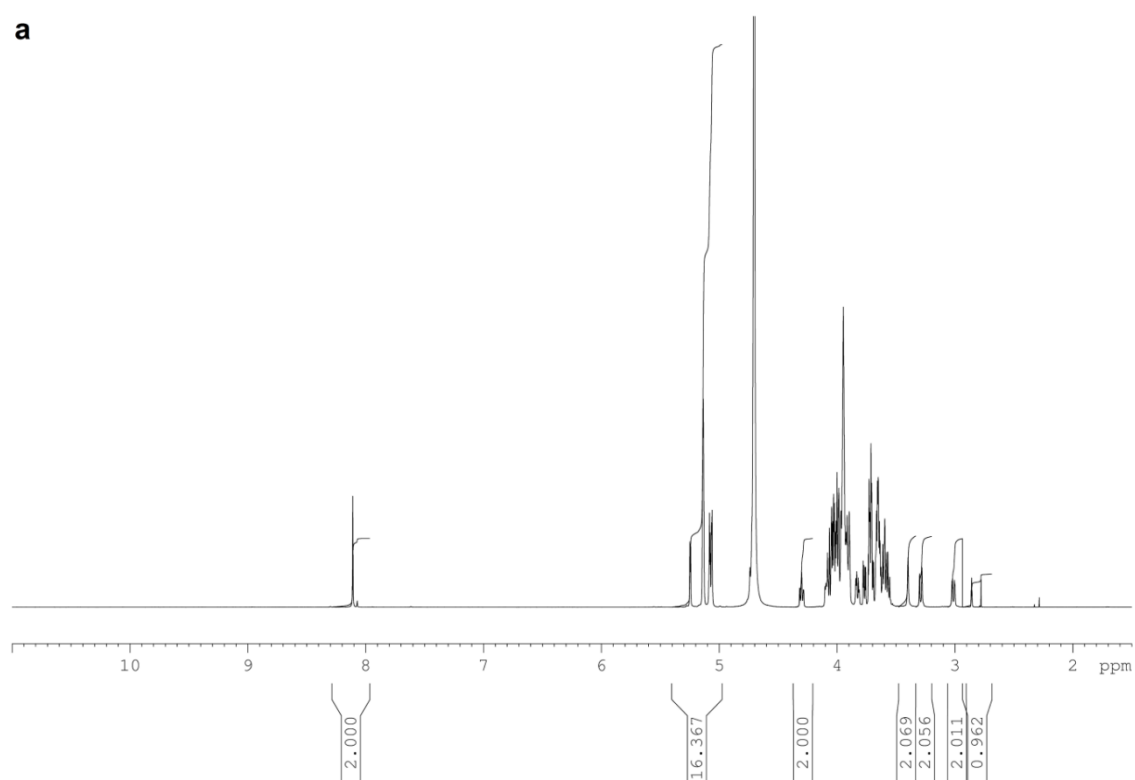

b

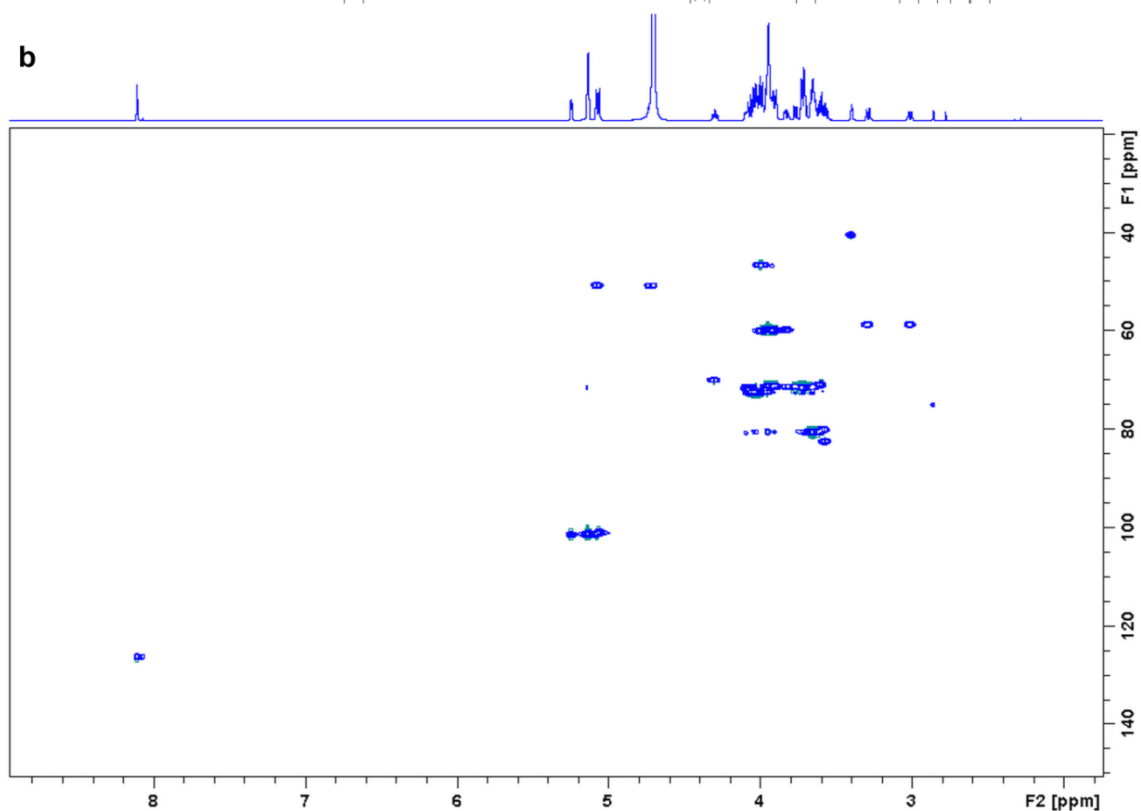

<sup>1</sup>H NMR (a) and <sup>13</sup>C HSQC (b) spectra of the  $\beta$ -CD dimer. Successful CuAAC is evident from the signal resonating at 8.1 ppm (triazole). Furthermore, a signal from the terminal alkyne is present at 2.9 ppm.

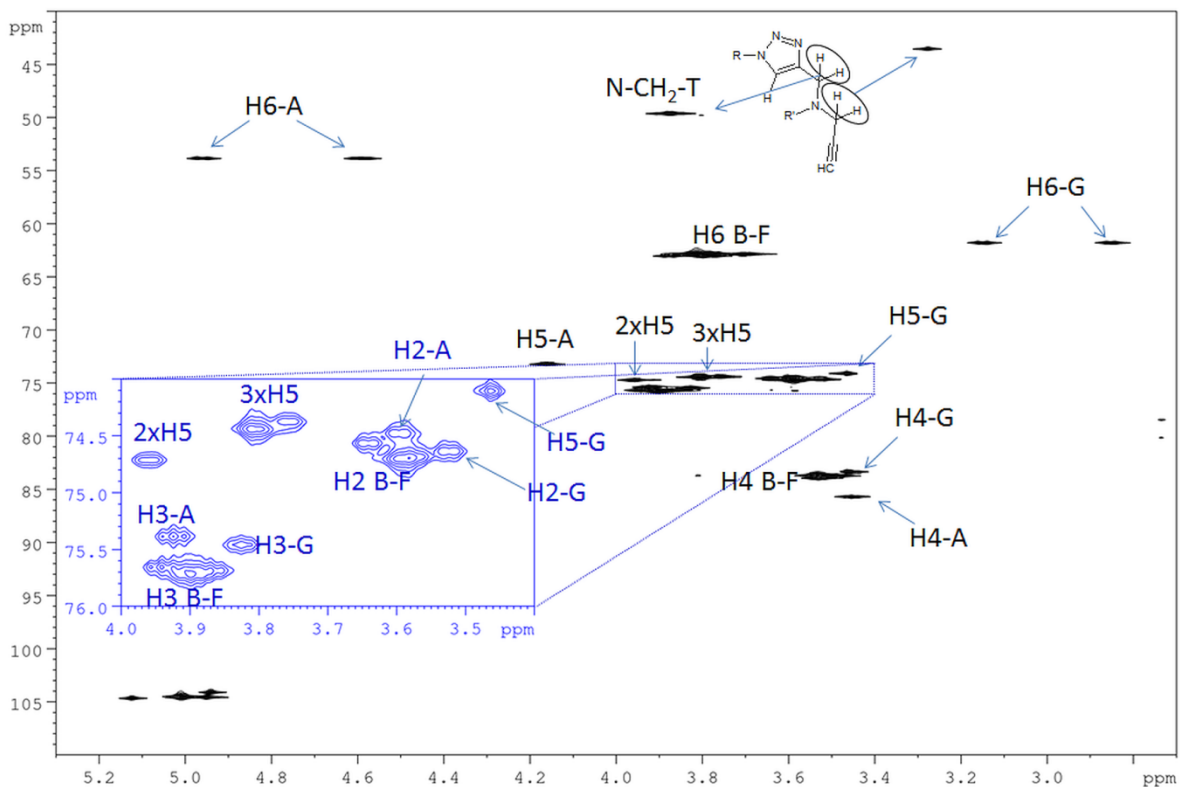

Region of a high-resolution  $^{13}\text{C}$  HSQC spectrum of the  $\beta$ -CD dimer in complex with 2,6-ANS with the resonance assignment. The region containing H2, 3 and 5 is enlarged (in blue). Letters refer to the glucose monomer in the  $\beta$ -CD: "A" refers to the glucose unit carrying the triazole linker, while "G" refers to the glucose unit, whose C4 is glycosidically linked to the C1 of "A".

## Self-association/quenching of 2,6-ANS

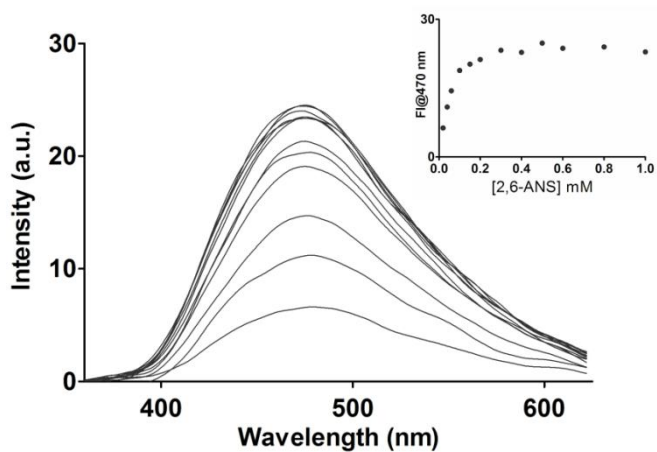

Titration series of 2,6-ANS (0.02–1 mM) recorded by TIRF spectroscopy on a clean and unmodified quartz slide.
